# Supplementary material for: Prospects for Expansion of Universal Newborn Screening in Bulgaria: A Survey among Medical Professionals
Source: MDPI journal article supplement (doi:10.3390/ijns9040057), 2023-10-11
Supplement: s1 [file s1]

**Supplementary File S2. Approval of inclusion in the panel for universal NBS in Bulgaria for the disorders studied (the full list is based on Loeber JG, Platis D, Zetterström RH, Almashanu S, Boemer F, Bonham JR, et al. Neonatal Screening in Europe Revisited: An ISNS Perspective on the Current State and Developments Since 2010. Int J Neonatal Screen. 2021 Mar 5;7(1):15.)**

| <b>Disorder / Group of disorders</b>                                   | <b>Approval of inclusion in the panel for universal NBS in Bulgaria</b> | <b>Rate of approval (n = 154)</b> |
|------------------------------------------------------------------------|-------------------------------------------------------------------------|-----------------------------------|
| Cystic fibrosis                                                        | 134                                                                     | 87.0%                             |
| Thalassemia                                                            | 112                                                                     | 72.7%                             |
| Spinal muscular atrophy                                                | 101                                                                     | 65.6%                             |
| Classical galactosemia                                                 | 91                                                                      | 59.1%                             |
| Severe combined immunodeficiencies                                     | 76                                                                      | 49.4%                             |
| Glucose-6-phosphate dehydrogenase deficiency                           | 72                                                                      | 46.8%                             |
| Maple syrup urine disease                                              | 59                                                                      | 38.3%                             |
| Homocystinuria                                                         | 55                                                                      | 35.7%                             |
| Tyrosinemia type I                                                     | 54                                                                      | 35.1%                             |
| Methylmalonic acidemia                                                 | 48                                                                      | 31.2%                             |
| x-Adrenoleukodystrophy                                                 | 42                                                                      | 27.3%                             |
| Tyrosinemia type II                                                    | 41                                                                      | 26.6%                             |
| Propionic acidemia                                                     | 40                                                                      | 26.0%                             |
| Biotinidase deficiency                                                 | 39                                                                      | 25.3%                             |
| Isovaleric acidemia (IVA)/2-Methylbutyrylglycinuria                    | 36                                                                      | 23.4%                             |
| Glutaric acidemia type I                                               | 35                                                                      | 22.7%                             |
| 3-Hydroxy-3-methylglutaric aciduria                                    | 33                                                                      | 21.4%                             |
| Multiple carboxylase deficiency                                        | 33                                                                      | 21.4%                             |
| Citrullinemia type I / II                                              | 30                                                                      | 19.5%                             |
| Medium-chain acyl-CoA dehydrogenase deficiency                         | 30                                                                      | 19.5%                             |
| Carnitine acylcarnitine translocase deficiency                         | 29                                                                      | 18.8%                             |
| Carnitine uptake defect                                                | 28                                                                      | 18.2%                             |
| Argininemia                                                            | 27                                                                      | 17.5%                             |
| Glutaric acidemia type II / multiple acyl coA dehydrogenase deficiency | 27                                                                      | 17.5%                             |

|                                                                                                      |    |       |
|------------------------------------------------------------------------------------------------------|----|-------|
| 3-Methylcrotonyl-CoA carboxylase deficiency/3-Methylglutacon aciduria/2-methyl-3-OH-butyric aciduria | 26 | 16.9% |
| Carnitine palmitoyltransferase type II/Carnitine acylcarnitine transporter deficiency                | 26 | 16.9% |
| Long-chain L-3-hydroxyacyl-CoA dehydrogenase deficiency/Trifunctional protein deficiency             | 26 | 16.9% |
| Very long-chain acyl-CoA dehydrogenase deficiency                                                    | 26 | 16.9% |
| Beta-ketothiolase deficiency                                                                         | 25 | 16.2% |
| Carnitine palmitoyltransferase deficiency type I                                                     | 25 | 16.2% |
| Argininosuccinic aciduria                                                                            | 23 | 14.9% |
| Short-chain acyl-CoA dehydrogenase deficiency                                                        | 23 | 14.9% |
| Remethylation disorders (methylenetetrahydrofolate reductase, methylcobalamine deficiencies)         | 22 | 14.3% |
| Holocarboxylase synthetase deficiency                                                                | 19 | 12.3% |
| Methionine adenosyl transferase I/III deficiency                                                     | 18 | 11.7% |
